# Supplementary material
Source: publisher figshare collection journal article supplement (https://future-science-group.figshare.com/articles/dataset/_/23622738)
Supplement: Supplementary file 1 [file 1]

**Supplementary Table 2.** Laboratory tests (other than markers of glucose homeostasis, residual beta-cell function and beta-cell autoimmunity) performed at 2 months, 14 months, 19 months and 31 months from the clinical onset of type 1 diabetes (T1D). At 24 months from disease diagnosis, we only measured HbA1c, fasting capillary blood ketones, serum 25-hydroxyvitamin D, fasting plasma glucose, fasting plasma C-peptide, along with plasma glucose and C-peptide values during a 120-minute-mixed meal tolerance test (MMTT) [see Supplementary Table 1].

| **Laboratory parameter*** | **2 months after the**  **T1D onset** | **14 months after**  **the T1D onset** | **19 months after**  **the T1D onset** | **31 months after**  **the T1D onset** |
| --- | --- | --- | --- | --- |
| **WBC count**  (4.00-10.00x103/mL) | 5.34x103/mL | 5.71x103/mL | 6.23x103/mL | 6.11x103/mL |
| **Neutrophils**  (1.8-7.0x103/mL; 40.0-75.0%) | 2.80x103/mL  (52.2%) | 3.01x103/mL  (52.8%) | 3.12x103/mL  (50.0%) | 3.01x103/mL  (49.2%) |
| **Lymphocytes**  (1.0-4.8x103/mL; 19.0-48.0%) | 2.10x103/mL  (40.0%) | 2.19x103/mL  (38.40%) | 2.59x103/mL  (41.50%) | 2.68x103/mL  (43.8%) |
| **Monocytes**  (0.1-0.8x103/mL; <12.0%) | 0.3x103/mL  (5.0%) | 0.36x103/mL  (6.3%) | 0.38x103/mL  (6.2%) | 0.24x103/mL  (3.9%) |
| **Eosinophils**  (0.0-0.5x103/mL; <6.0%) | 0.1x103/mL  (1.7%) | 0.12x103/mL  (2.1%) | 0.08x103/mL  (1.3%) | 0.08x103/mL  (1.3%) |
| **Basophils**  (0.0-0.2x103/mL; <2.0%) | 0.1x103/mL  (1.0%) | 0.03x103/mL  (0.5%) | 0.07x103/mL  (1.1%) | 0.03x103/mL  (0.5%) |
| **RBC count**  (4.40-5.90x106/mL) | 5.21x106/mL | 5.07x106/mL | 5.11x106/mL | 5.21x106/mL |
| **Hb**  (14.0-18.0 g/dL) | 15.7 g/dL | 15.1 g/dL | 15.3 g/dL | 15.4 g/dL |
| **Ht**  (41-51%) | 46% | 43.2% | 44.5% | 46.6% |
| **MCV**  (82.0-98.0 fl) | 88.9 fl | 85.2 fl | 87.0 fl | 89.5 fl |
| **MCH**  (27.0-34.0 pg) | 30.1 pg | 29.7 pg | 29.9 pg | 29.6 pg |
| **MCHC**  (32.0-36.0 g/dL) | 33.9 g/dL | 34.9 g/dL | 34.3 g/dL | 33.0 g/dL |
| **Platelet count**  (150-450x103/mL) | 153x103/mL | 160x103/mL | 163x103/mL | 239x103/mL |
| **BUN**  (19-44 mg/dL) | 35 mg/dL | 38 mg/dL | 39 mg/dL | 27 mg/dL |
| **Creatinine**  (0.73-1.18 mg/dL) | 1.05 mg/dL | 0.84 mg/dL | 1.13 mg/dL | 1.22 mg/dL |
| **eGFR (CKD-EPI)** | 100.3 mL/min/1.73m2 | 122.6 mL/min/1.73m2 | 90.5 mL/min/1.73m2 | 81.9 mL/min/1.73m2 |
| **Uric acid**  (3.57-7.20 mg/dL) | 5.5 mg/dL | 5.0 mg/dL | 5.0 mg/dL | 4.8 mg/dL |
| **Total serum protein level**  (60-80 g/L) | 65 g/L | 63 g/L | 68 g/L | n/a |
| **Total bilirubin**  (<1.20 mg/dL) | 0.63 mg/dL | 0.54 mg/dL | 1.15 mg/dL | 0.45 mg/dL |
| **Direct bilirubin**  (<0.5 mg/dL) | 0.36 mg/dL | 0.25 mg/dL | 0.40 mg/dL | 0.15 mg/dL |
| **AST**  (5-34 U/L) | 19 U/L | 22 U/L | 23 U/L | 35 U/L |
| **ALT**  (0-55 U/L) | 13 U/L | 11 U/L | 14 U/L | 31 U/L |
| **GGT**  (12-64 U/L) | 12 U/L | 12 U/L | 13 U/L | 10 U/L |
| **ALP**  (40-150 U/L) | 58 U/L | 62 U/L | 48 U/L | n/a |
| **Calcium**  (8.4-10.2 mg/dL) | 8.9 mg/dL | 8.8 mg/dL | 9.4 mg/dL | 9.4 mg/dL |
| **Phosphorus**  (2.3-4.7 mg/dL) | 3.3 mg/dL | 3.3 mg/dL | 4.0 mg/dL | 3.4 mg/dL |
| **Magnesium**  (1.6-2.6 mg/dL) | 2.2 mg/dL | 2.3 mg/dL | 2.2 mg/dL | n/a |
| **Sodium**  (135-145 mmol/L) | 142 mmol/L | 141 mmol/L | 139 mmol/L | n/a |
| **Potassium**  (3.5-5.1 mmol/L) | 3.63 mmol/L | 3.8 mmol/L | 3.7 mmol/L | n/a |
| **Serum iron**  (65-175 mg/dL) | 70 mg/dL | 68 mg/dL | 155 mg/dL | n/a |
| **Transferrin**  (174-364 mg/dL) | 211 mg/dL | 219 mg/dL | 213 mg/dL | n/a |
| **Ferritin**  (21.8-275 ng/mL) | 132 ng/mL | 100 ng/mL | 107 ng/mL | n/a |
| **Albumin**  (35-50 g/L) | 42 g/L | 42.8 g/L | 46.6 g/L | n/a |
| **Total cholesterol**  (<200 mg/dL) | 146 mg/dL | 132 mg/dL | 160 mg/dL | 143 mg/dL |
| **HDL-cholesterol**  (>40 mg/dL) | 42 mg/dL | 49 mg/dL | 54 mg/dL | 45 mg/dL |
| **LDL-cholesterol**  (<130 mg/dL) | 95 mg/dL | 77 mg/dL | 102 mg/dL | 90 mg/dL |
| **Triglycerides**  (<150 mg/dL) | 46 mg/dL | 38 mg/dL | 26 mg/dL | 41 mg/dL |
| **TSH**  (0.35-4.94 mIU/mL) | 1.07 mIU/mL | 1.41 mIU/mL | 1.26 mIU/mL | 1.28 mIU/mL |
| **FT3**  (1.72-3.54 pg/mL) | 2.74 pg/mL | 2.46 pg/mL | 2.83 pg/mL | n/a |
| **FT4**  (0.7-1.48 ng/dL) | 0.90 ng/dL | 0.88 ng/dL | 1.04 ng/dL | n/a |
| **Anti-thyroid peroxidase (TPO) antibodies**  (0.0-5.6 IU/mL) | 0.0 IU/mL | n/a | 0.2 IU/mL | n/a |
| **Antithyroglobulin antibodies**  (0.0-4.1 IU/mL) | 2.0 IU/mL | n/a | 0.9 IU/mL | n/a |
| **Tissue transglutaminase IgA antibodies**  (<10 AU/mL) | 2.40 AU/mL | 2.30 AU/mL | 2.50 AU/mL | n/a |
| **Total IgA**  (0.70-3.78 g/L) | n/a | 1.15 g/L | 1.10 g/L | n/a |
| **Total testosterone**  (2.40-8.70 ng/mL) | 4.02 ng/mL | 4.38 ng/mL | 3.37 ng/mL | n/a |
| **Serum cortisol - 08:00 AM**  (3.7-19.4 mg/dL) | n/a | 13.3 mg/dL | n/a | n/a |
| **ACTH - 08:00 AM**  (4.7-48.8 pg/mL) | n/a | 15 pg/mL | n/a | n/a |
| **Vitamin B12**  (187-883 pg/mL) | 442 pg/mL | 389 pg/mL | 509 pg/mL | n/a |
| **Folate**  (3.1-20.5 ng/mL) | 5.5 ng/mL | 4.8 ng/mL | 9.2 ng/mL | n/a |
| **PTH**  (15.0-83.1 pg/mL) | n/a | 40.6 pg/mL | 48.6 pg/mL | 32.4 pg/mL |
| **25(OH)D**  (≥30 ng/mL) | 28 ng/mL | 57 ng/mL | 45 ng/mL | 31.4 ng/mL |
| **Urinalysis** | Absence of glucose, proteins, ketones and nitrites in urine; Albumin-to-creatinine ratio (ACR) 15 mg/g | Absence of glucose, proteins, ketones and nitrites in urine; Albumin-to-creatinine ratio (ACR) 15 mg/g | Absence of glucose, proteins, ketones and nitrites in urine; Albumin-to-creatinine ratio (ACR) 15 mg/g | Absence of glucose, proteins, ketones and nitrites in urine; Spot morning urinary albumin concentration (UAC) 3.8 mg/L |

*Reference ranges at our Institution are shown in brackets.

**Abbreviations**: 25(OH)D, 25-hydroxyvitamin D; ACTH, adrenocorticotropic hormone; ALP, alkaline phosphatase; ALT, alanine aminotransferase; AST, aspartate aminotransferase; BUN, blood urea nitrogen; eGFR (CKD-EPI), estimated glomerular filtration rate calculated through the CKD-EPI (Chronic Kidney Disease Epidemiology Collaboration) equation; FT3, free triiodothyronine; FT4, free thyroxine; GGT, gamma-glutamyl transferase; Hb, hemoglobin; HDL-cholesterol, high-density lipoprotein cholesterol; Ht, hematocrit; IgA, Immunoglobulin A; LDL-cholesterol, low-density lipoprotein cholesterol; MCH, mean corpuscular hemoglobin; MCHC, mean corpuscular hemoglobin concentration; MCV, mean corpuscular volume; PTH, parathyroid hormone; RBC, red blood cell count; TSH, thyroid-stimulating hormone; UAC, urinary albumin concentration; WBC, white blood cell count.
